# Supplementary material for: Effect of peripheral cellular senescence on brain aging and cognitive decline
Source: PubMed Central journal article supplement (PMC10186609; doi:10.1111/acel.13817), 2023-03-23

# Supplemental Figure 1

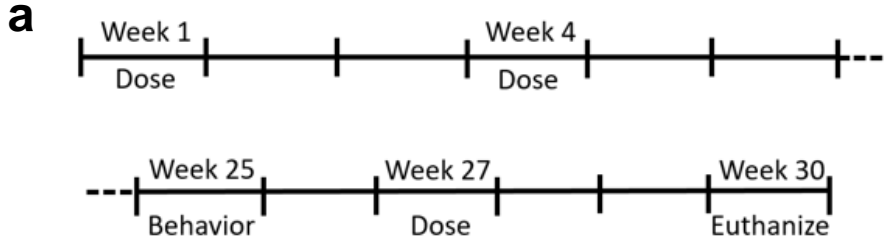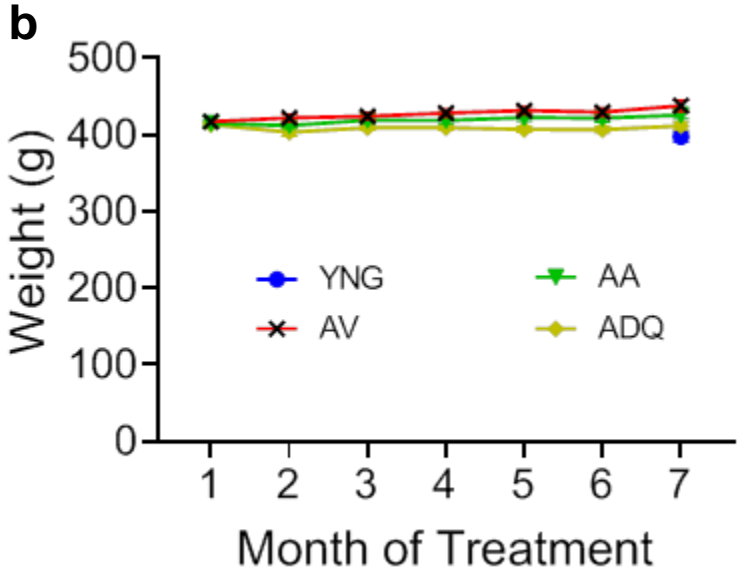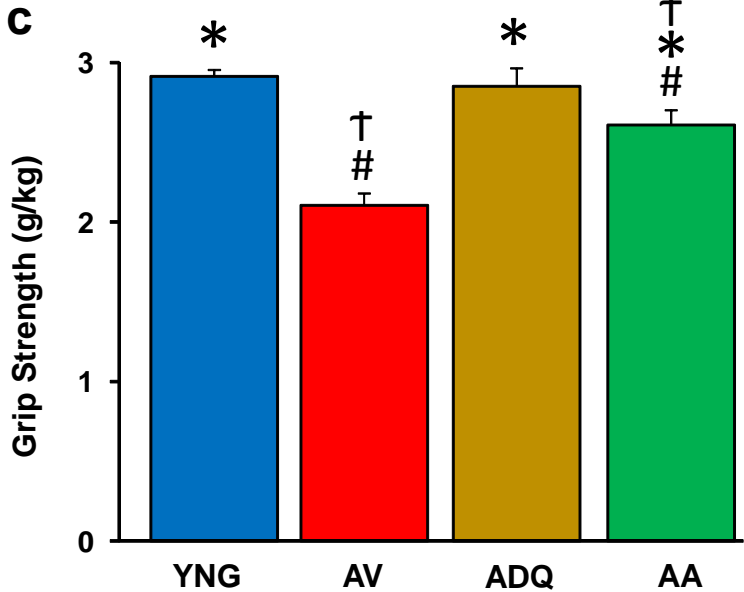

Supplement: ACEL-22-e13817-s002.pdf [file ACEL-22-e13817-s002.pdf]
