# Supplementary material for: Effect of peripheral cellular senescence on brain aging and cognitive decline
Source: PubMed Central journal article supplement (PMC10186609; doi:10.1111/acel.13817), 2023-03-23
Supplement: ACEL-22-e13817-s003.pdf [file ACEL-22-e13817-s003.pdf]

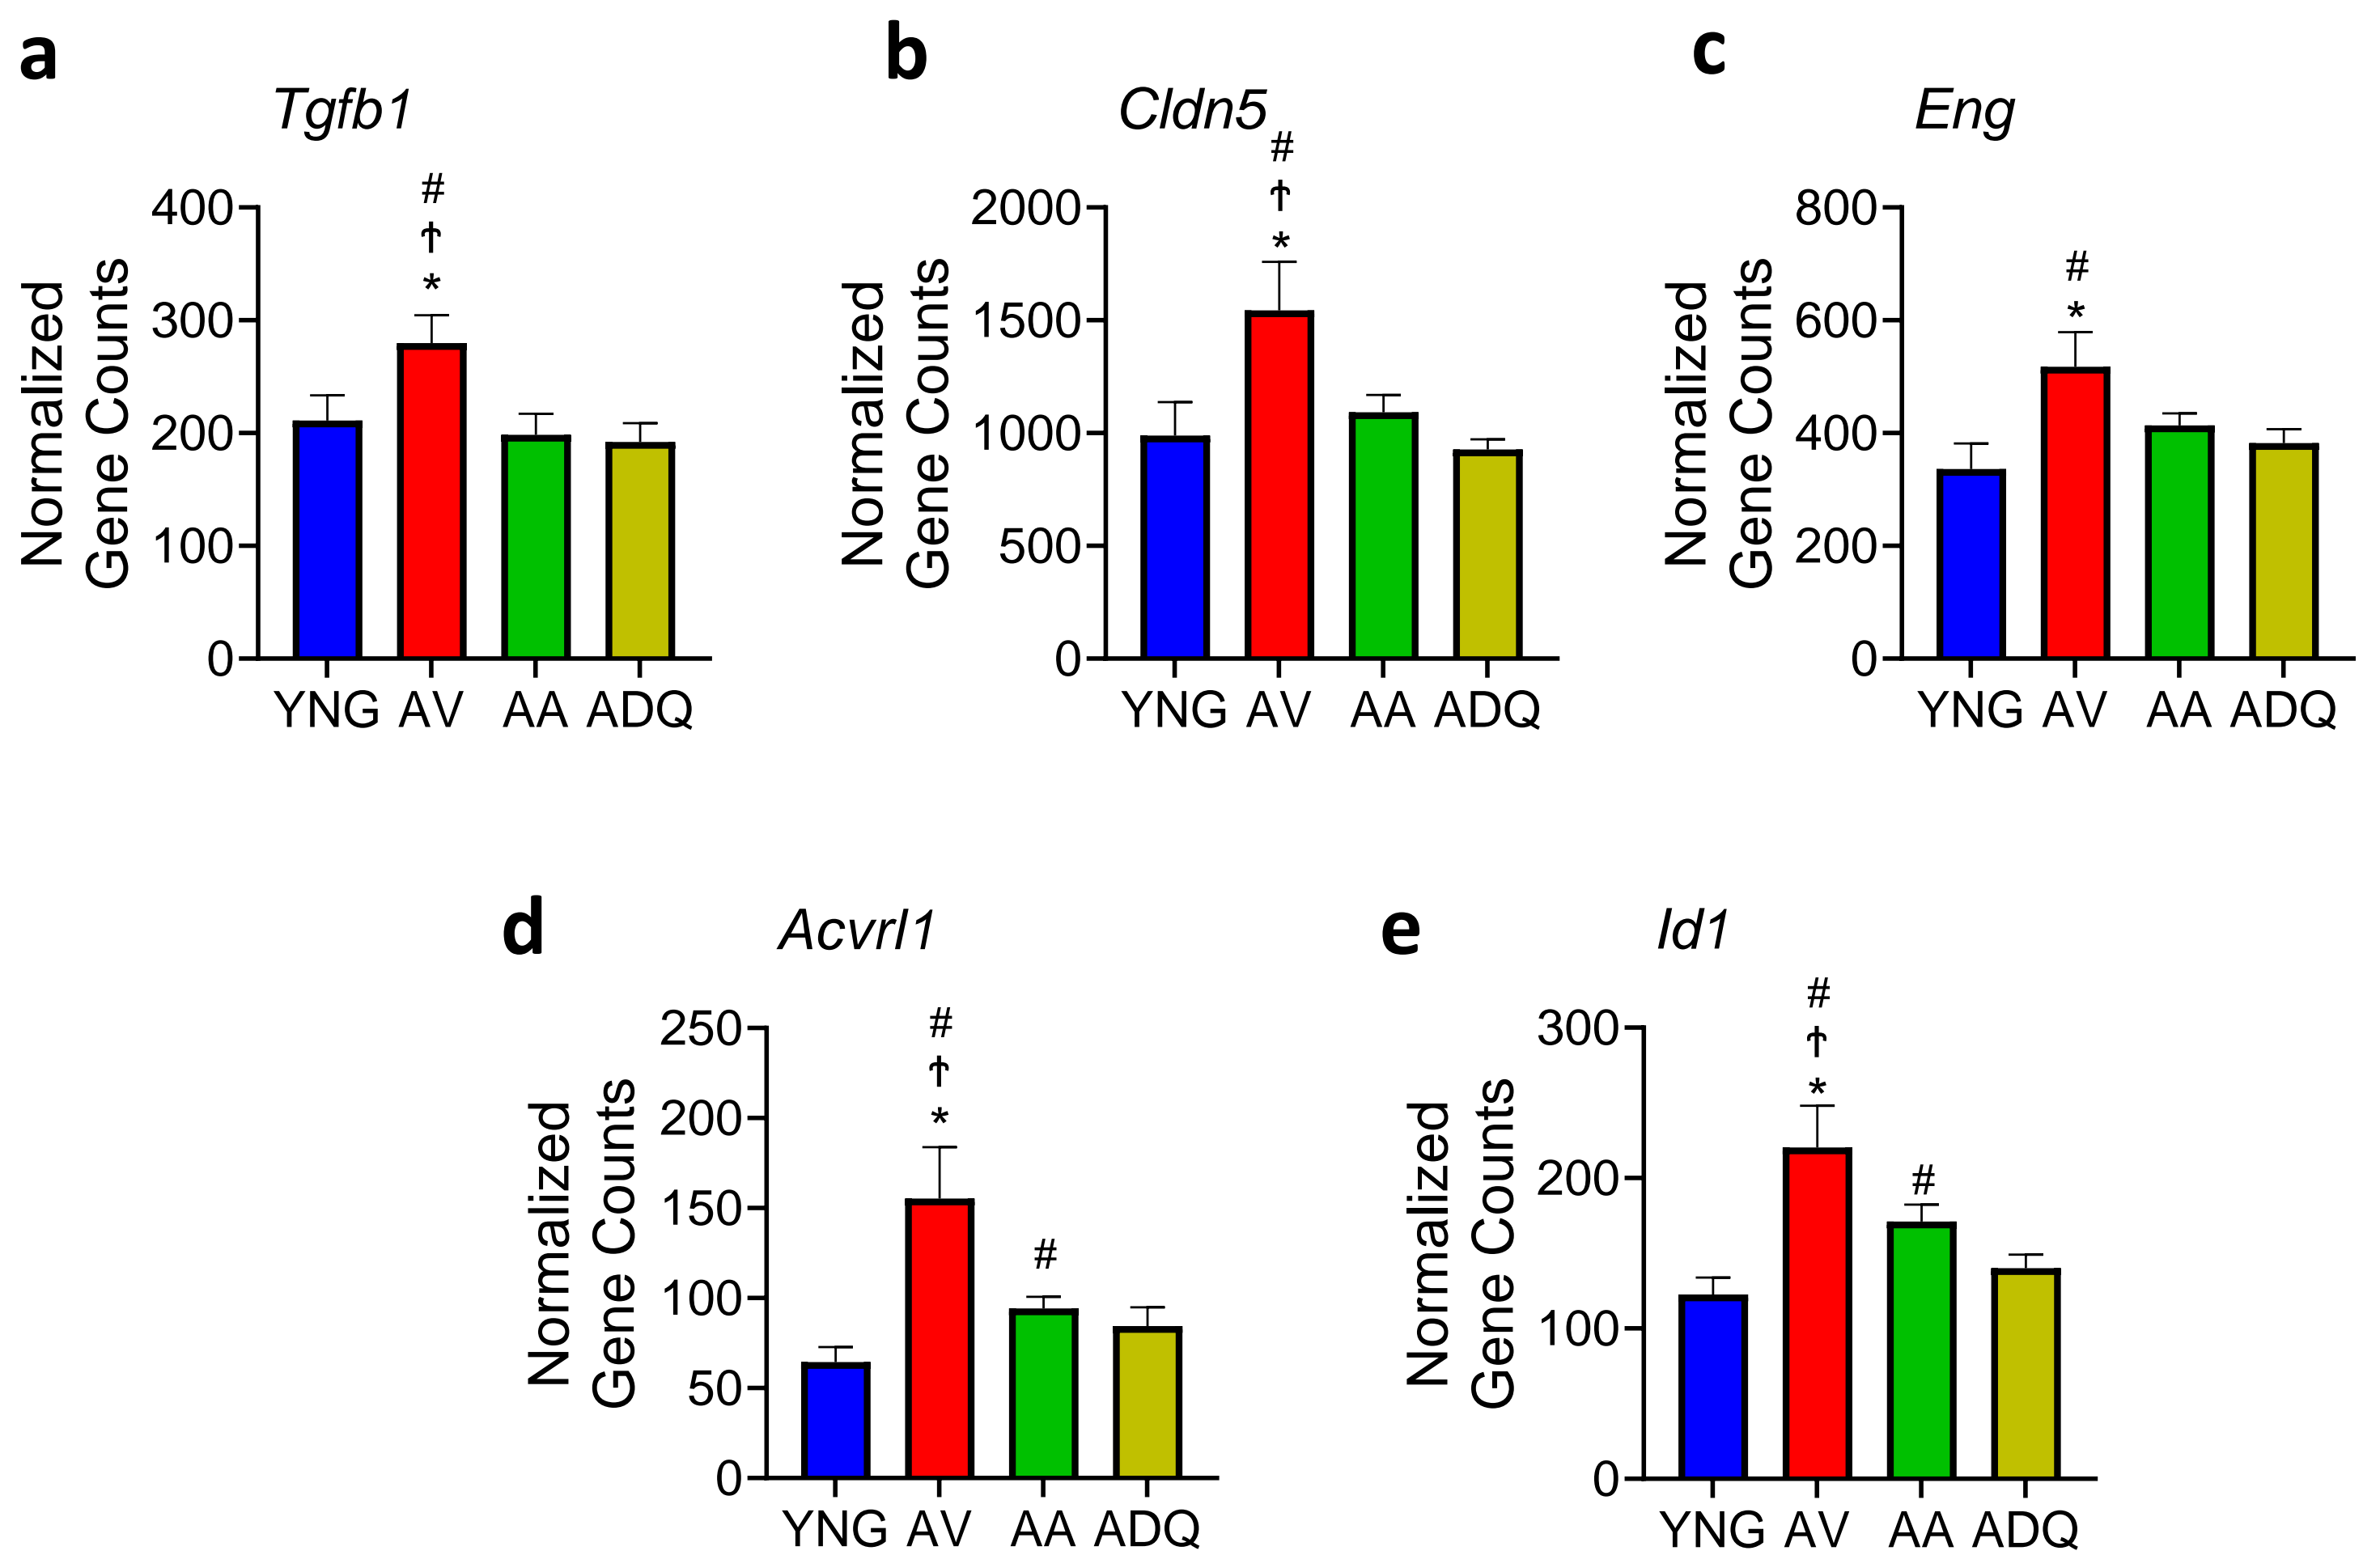

Expression levels of genes involved in TGF- $\beta$  signaling as obtained from mRNA sequencing (a-e). Normalized gene counts of *tgfb1* (a), *cldn5* (b), *Eng* (c), *acvr11* (d) and *id1* (e).

# significantly different when compared to YNG  
 † significantly different when compared to AA  
 \* Significantly different when compared to ADQ
